# Supplementary material
Source: Preprints.org preprint supplement (doi:10.20944/preprints202101.0561.v1)
Supplement: Supplementary file 2 [file supplementary]

## Sheet: 藥敏
			n	AM	AMC	AN	ATM	CAZ	CC	CF	CIP	CL	CRO	CXM	CZ	DOR	E	ETP	FA	FEP	FLO	GM	HGM	IPM	LVX	LZD	MEM	MET	OX	P	PIP	SAM	SXT	TEC	TGC	TZP	VA
		Acineto_baumannii	1			2S	2R	2S	2S		2S						1R1S			2S		2S		2S			2S		2R	2R	2I	2S	1R1S	2S		2S	2S
		Acinetobacter_sp	1			1S	1R	1S			1S		1R							1S		1S		1S							1I	1S	1S			1S
		B_fragilis	1						3S																			3S		3R	3S	3S
		B_thetaiotaomicron	1		1S				1S																			1S		1R	1S
		Bacillus	1			1S	1R	1S	1S		1S						1R			1S		1S		1S			1S		1R	1R	1I	1S	1R	1S		1S	1S
		Citrob_freundii	1			1S		1S			1S		1S	1S	1S			1S				1S			1S							1S	1S			1S
		Coag_staphylococcus	3	3S	1S	3S	2R1S	3S	5S		3S		1S	1R	1R		4R1S			2S		3S	2S	3S		1S	2S		3R2S	5R2S	2I1S	2S	4R1S	8S		3S	8S
		Enterococcus_faecalis	13	1R25S	1R3S	18S	5S	18S	3S	1I1R	18S		18S	1I9R8S	16R		3R	13S			1S	18S	17S	5S	13S	1S			1R2S	3R19S	4S	1I6R6S	3R16S	28S		15S	26S
		Morganella_morganii	16	1R12S	1I2R3S	20S	8S	20S	1S	1I1R	20S	1R	19S	3I7R9S	16R1S	1S	1R	12S		1S	1S	20S	5S	1I7S	12S	1S	1S		1R	1R7S	7S	1I3R8S	1R15S	13S		17S	11S
		Providencia_rettgeri	1	1S		1S		1S			1S		1S	1S	1R			1S				1S	1S		1S					1S		1R	1S	1S		1S	1S
		Serratia_marcescens	2	5S		8S	1S	8S			8S	1R	7S	7R	7R	1S		7S		1S		8S	5S	1I	7S		1S			5S	1S	7R	7S	5S		8S	5S
		Shewanella_algae	2			4S	1R1S	4S			4S	1R1S	2S	2R	2R	1S		2S		2S		4S		2I	2S		2S				2S	2R	2S			4S
		Staph_aureus	1						1R								1R		1S							1S			1R	1R			1S	1S	1S		1S
		Yeast_like	1	1S		1S		1S			1S		1S	1I	1R			1S				1S			1S					1S		1S	1S	1S		1S	1S
		AM	ampicillia
		AMC	augmentin
		AN	amikacin
		ATM	aztreonam
		CAZ	ceftazidime
		CC	clindamycin
		CF	Cefaclor
		CIP	ciprofloxacin
		CL	Colistin
		CRO	Ceftriaxone
		CXM	cefuroxime
		CZ	Cefazolin
		DOR	Doripenem
		E	Erythromycin
		ETP	Ertapenem
		FA	Fucidic Acid
		FEP	Cefepime
		FLO	Ofloxacin
		GM	gentamicin
		HGM	high level gentamicin
		IPM	Imipenem
		LVX	levofloxacin
		LZD	Linezolid
		MEM	Meropenem
		MET	metronidazole
		OX	Oxacillin
		P	Penicillin
		PIP	Piperacillin
		SAM	Amp/Sulbactam
		SXT	trimethoprim- sulfamethoxazole
		TEC	teicoplanin
		TGC	Tigecycline
		TZP	Tazocin
		VA	vancomycin

## Sheet: 全名
		AM	ampicillia
		AMC	augmentin
		AN	amikacin
		ATM	aztreonam
		CAZ	ceftazidime
		CC	clindamycin
		CF	Cefaclor
		CIP	ciprofloxacin
		CL	Colistin
		CRO	Ceftriaxone
		CXM	cefuroxime
		CZ	Cefazolin
		DOR	Doripenem
		E	Erythromycin
		ETP	Ertapenem
		FA	Fucidic Acid
		FEP	Cefepime
		FLO	Ofloxacin
		GM	gentamicin
		GMM
		HGM	high level gentamicin
		IPM	Imipenem
		LVX	levofloxacin
		LZD	Linezolid
		MEM	Meropenem
		MET
		OX	Oxacillin
		P	Penicillin
		PIP	Piperacillin
		SAM	Amp/Sulbactam
		SXT	trimethoprim- sulfamethoxazole
		TEC	teicoplanin
		TGC	Tigecycline
		TZP	Tazocin
		VA	vancomycin
